# Supplementary material
Source: PubMed Central journal article supplement (PMC10433845)
Supplement: spectrum.01166-23-s0001.pdf [file spectrum.01166-23-s0001.pdf]

## Supplemental Figures

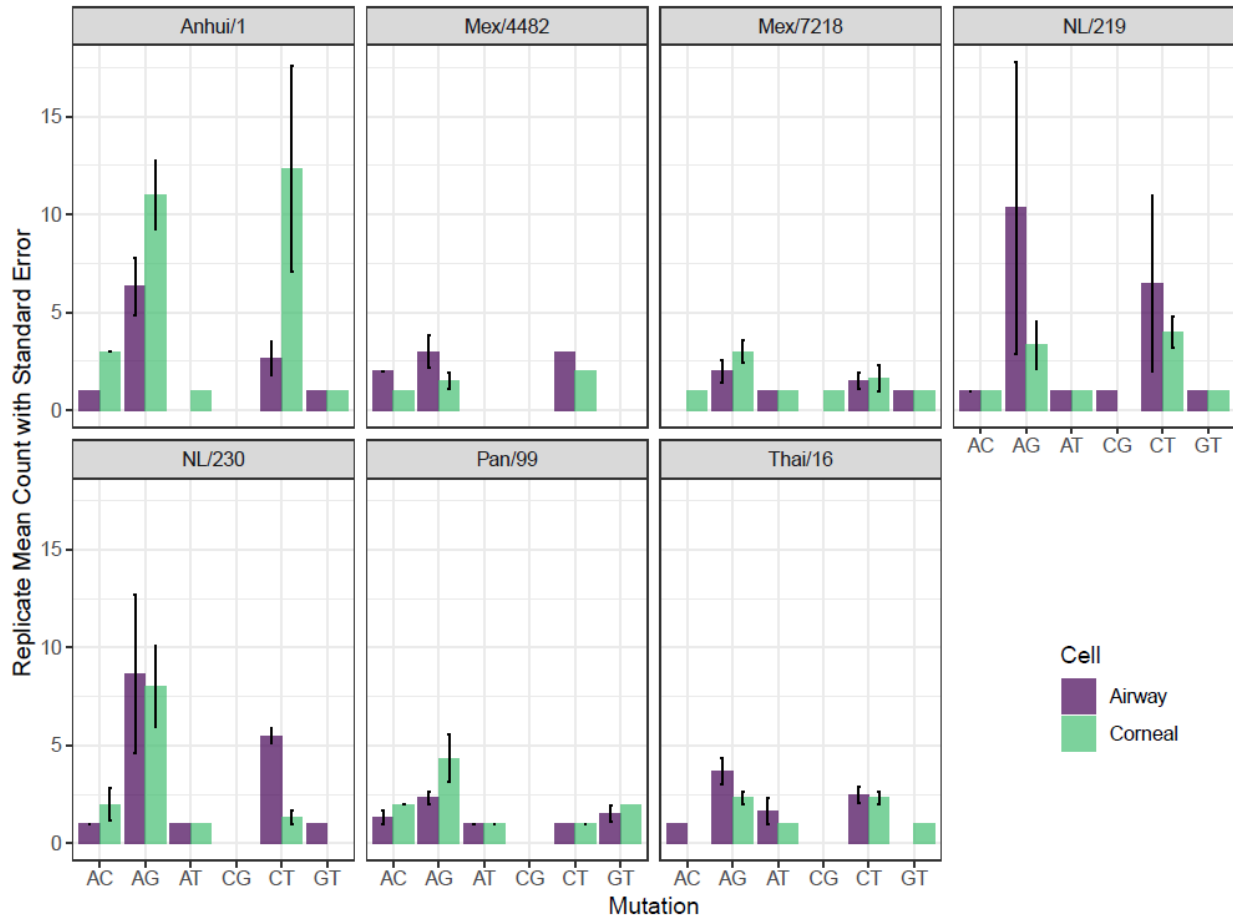

**Figure S1. Base change counts of influenza A viruses in respiratory or corneal cultures.** Mean counts across all replicates with standard error bars in EpiAiway (purple) and EpiCorneal (green) tissue constructs at 72 hours p.i.

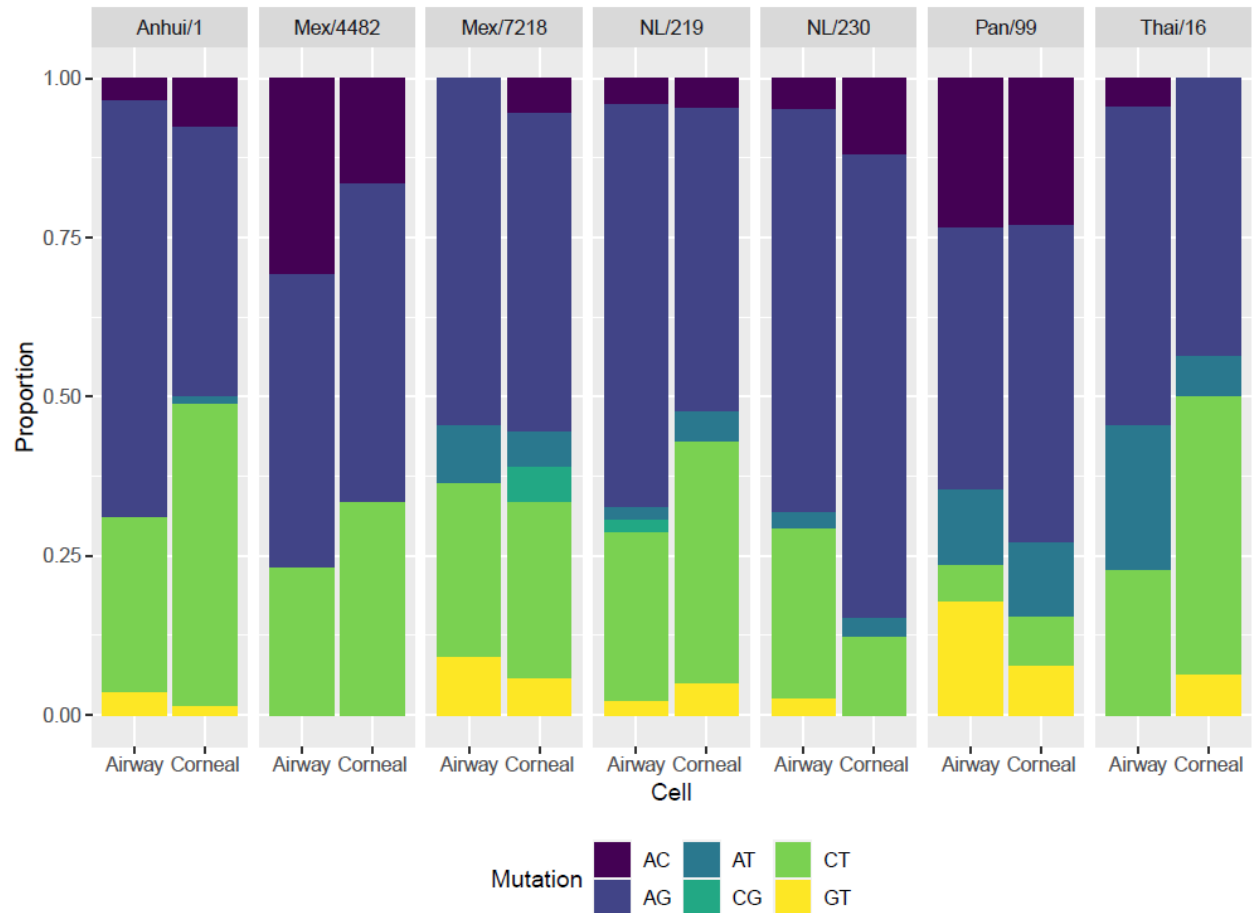

**Figure S2. Proportional base change of influenza A viruses in respiratory or corneal cultures.**

Mean counts across all replicates as a proportion of the overall total in EpiAiway and EpiCorneal tissue constructs for all viruses.

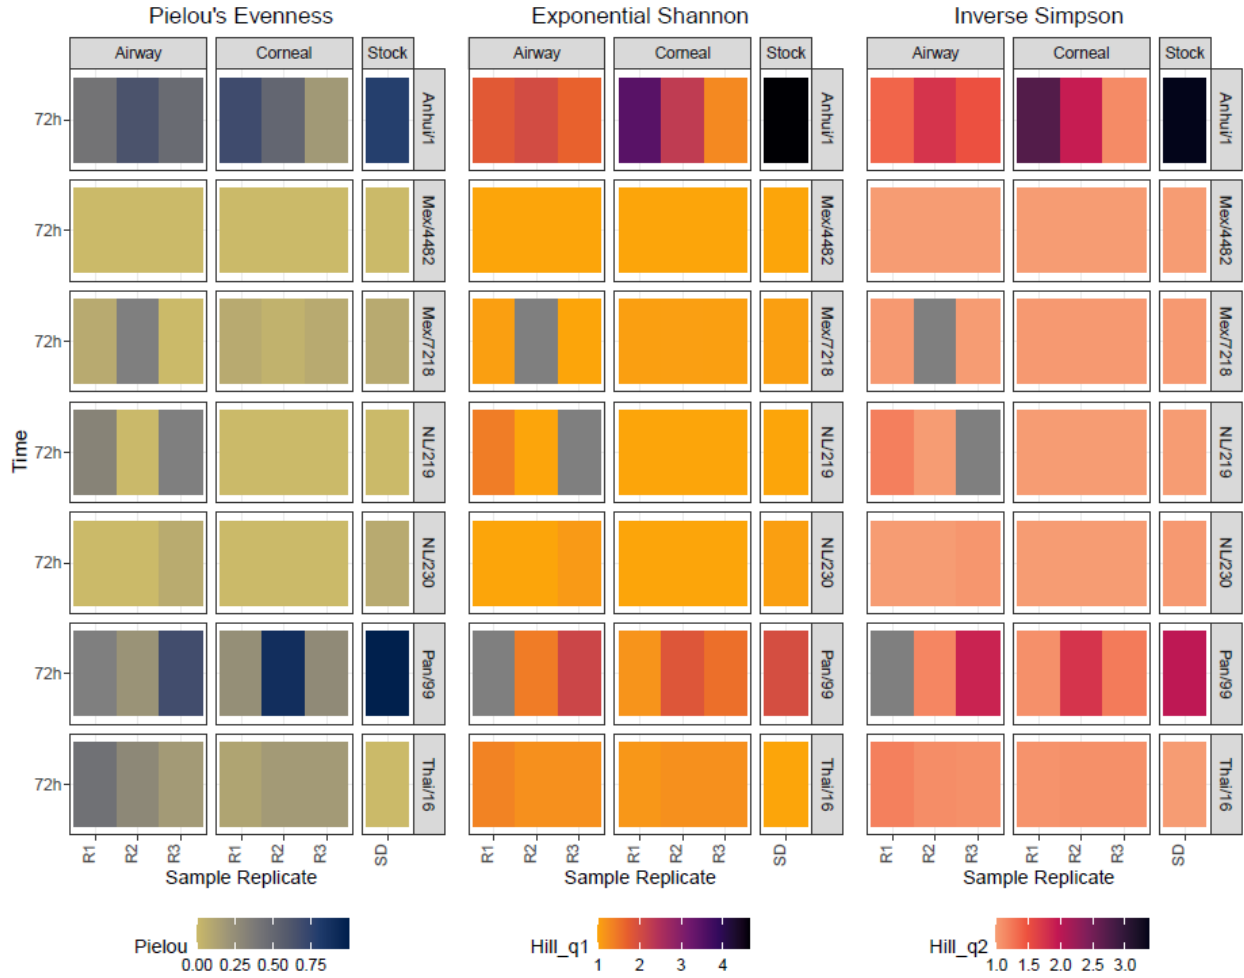

**Figure S3. Influenza A virus diversity metrics following multicycle replication in respiratory or corneal cultures.** Heatmap of Pielou’s Evenness, Exponential Shannon, or Inverse Simpson for each of the seven influenza A viruses for each tissue construct (airway, corneal) at 72 hours p.i. and stock viral quasispecies populations. R1-R3, individual sample replicates; SD, diluted inoculum stock. Dark gray shading represents missing data.

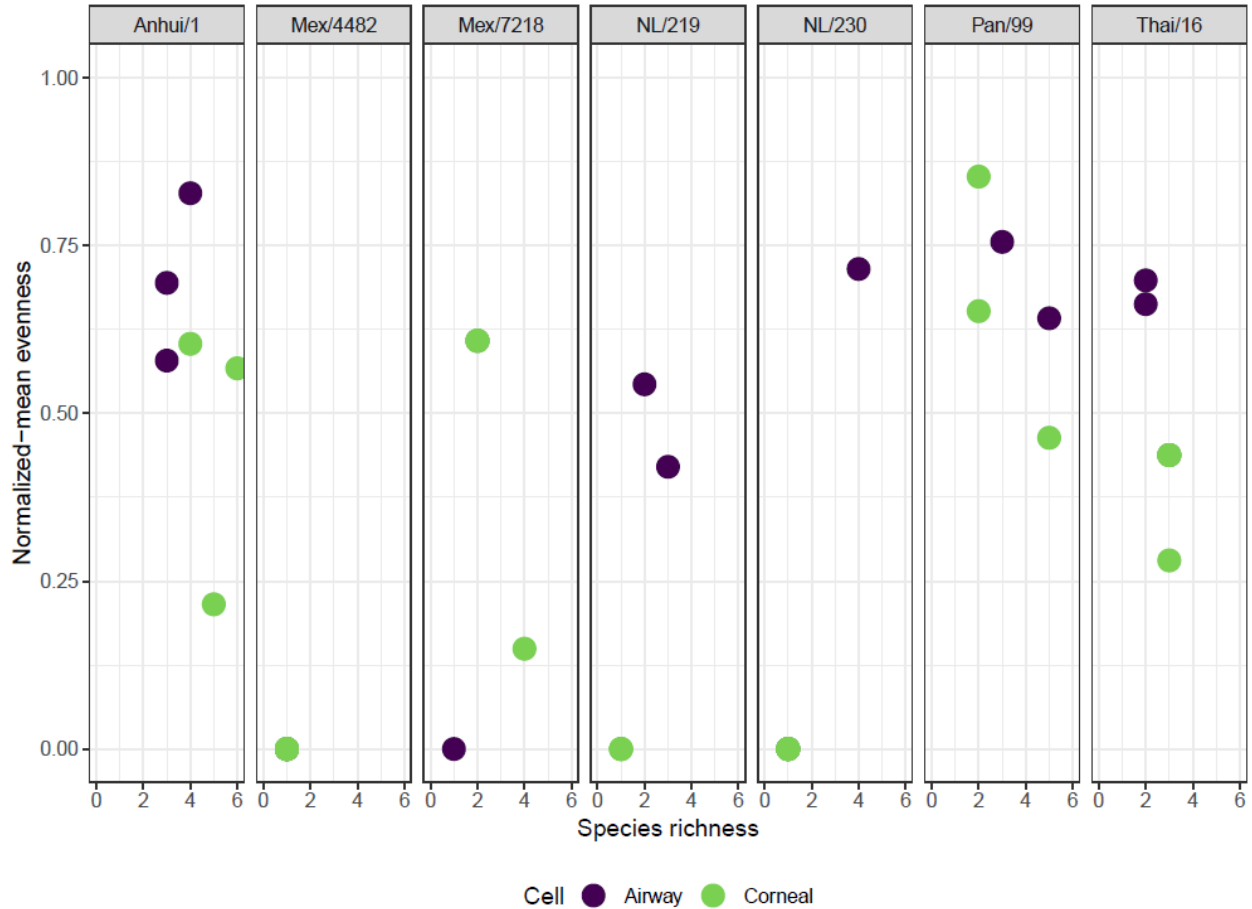

**Figure S4. Influenza A virus diversity metrics, Normalized-median evenness by Species richness.** Plotted comparison of viral quasispecies diversity of evenness by richness for EpiAirway (purple) and EpiCorneal (green) tissue constructs at 72 hours p.i. for all seven viruses.

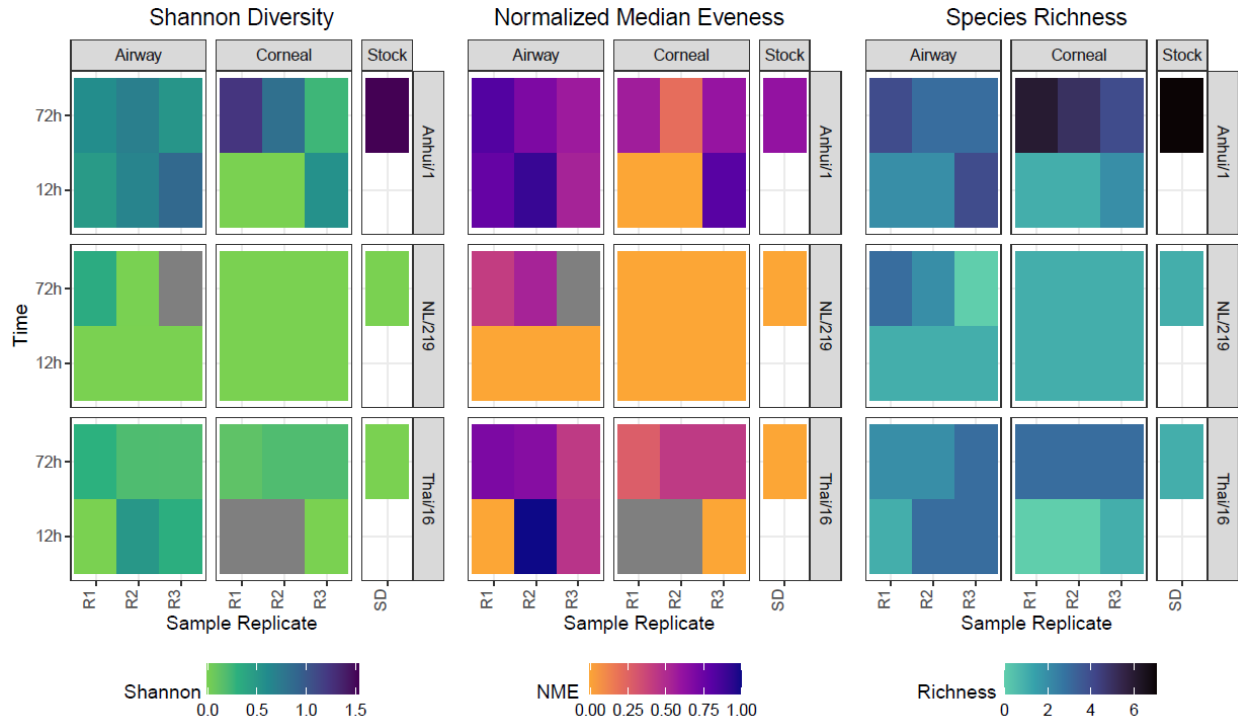

**Figure S5. Influenza A virus diversity metrics following multicycle replication in respiratory or corneal cultures.** Heatmap of Shannon diversity, normalized median evenness, and species richness for three representative influenza A viruses for each tissue construct (airway, corneal) at either 12 or 72 hours p.i. and stock viral quasispecies populations. R1-R3, individual sample replicates; SD, diluted inoculum stock. Dark gray shading represents missing data.

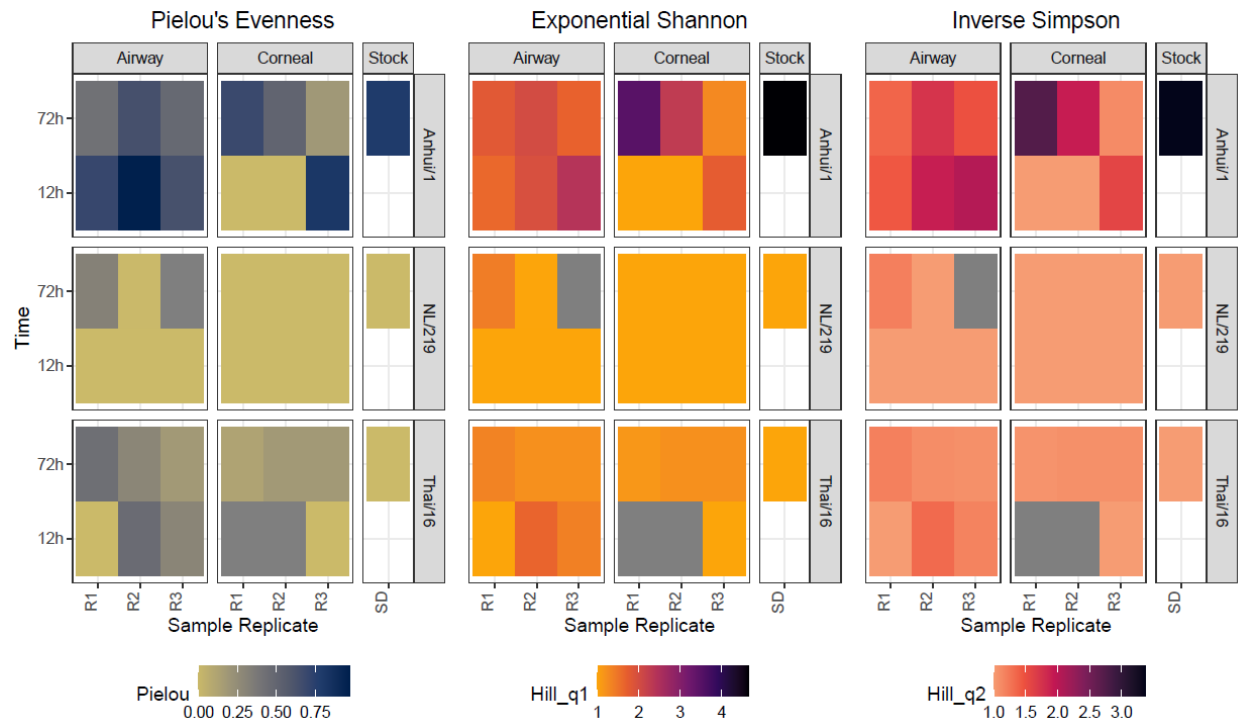

**Figure S6. Influenza A virus diversity metrics following multicycle replication in respiratory or corneal cultures.** Heatmap of Pielou’s Evenness, Exponential Shannon (Hill number 1), or Inverse Simpson (Hill number 2) for three representative influenza A viruses for each tissue construct (airway, corneal) at either 12 or 72 hours p.i. and stock viral quasispecies populations. R1-R3, individual sample replicates; SD, diluted inoculum stock. Dark gray shading represents missing data.

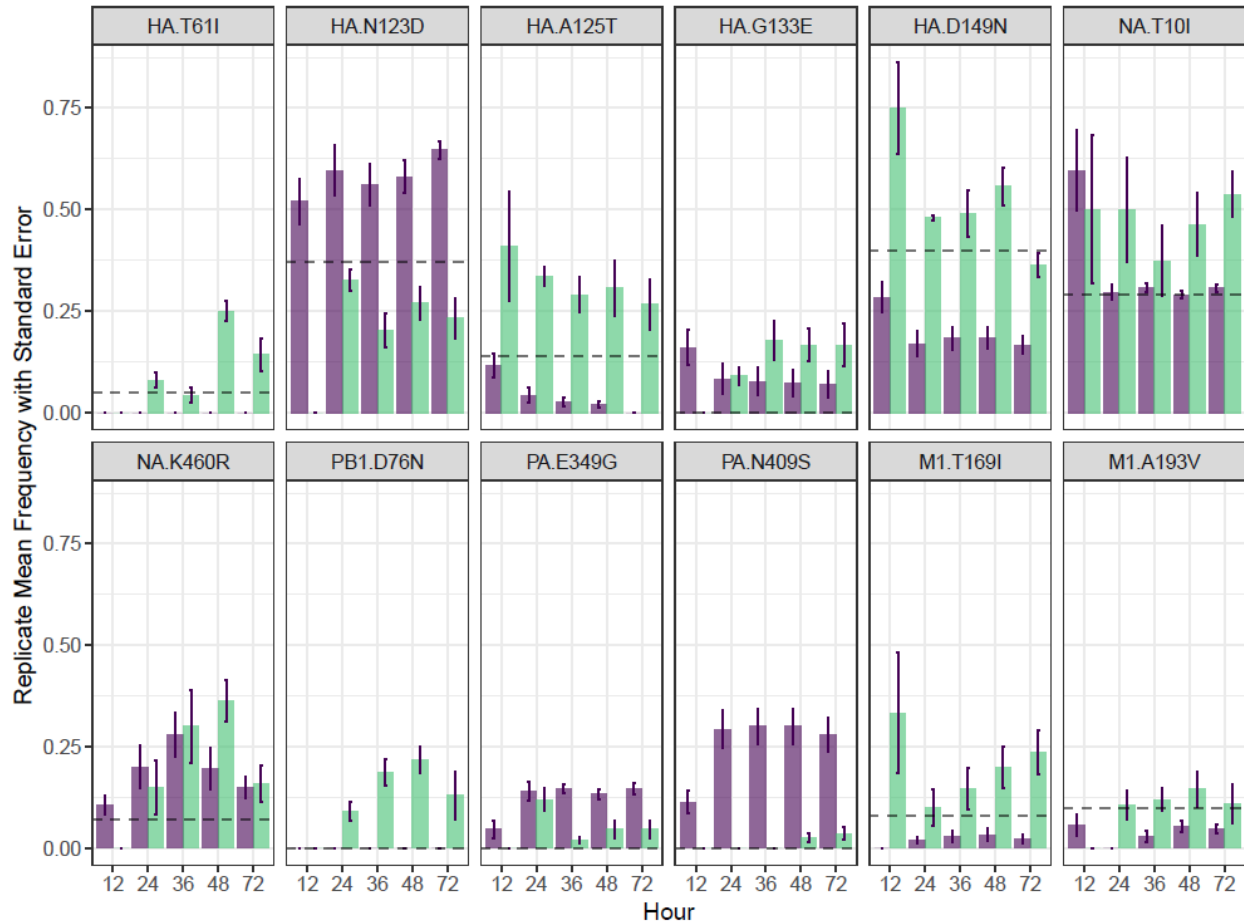

**Figure S7. Viral mutation frequency of Anhui/1 (LPAI H7N9) influenza A virus over time in respiratory or corneal cultures.** Selected mutations of interest showing mean frequency across all replicates with standard error bars in EpiAiway (purple) and EpiCorneal (green) tissue constructs between 12-72 hours p.i. Dashed black line represents the stock inoculum mean frequency.

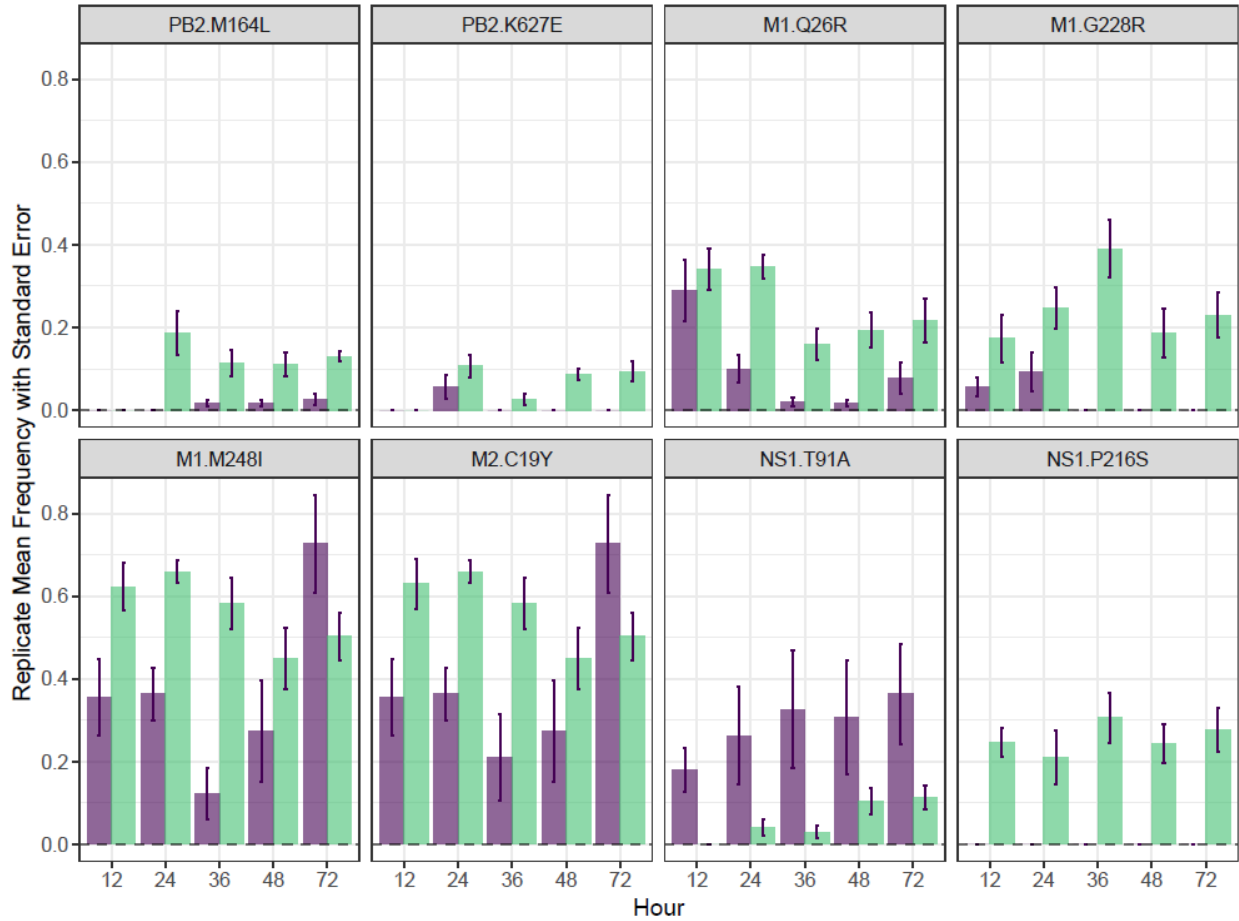

**Figure S8. Viral mutation frequency of NL/219 (HPAI H7N7) influenza A virus over time in respiratory or corneal cultures.** Selected mutations of interest showing mean frequency across all replicates with standard error bars in EpiAiway (purple) and EpiCorneal (green) tissue constructs between 12-72 hours p.i. Dashed black line represents the stock inoculum mean frequency.



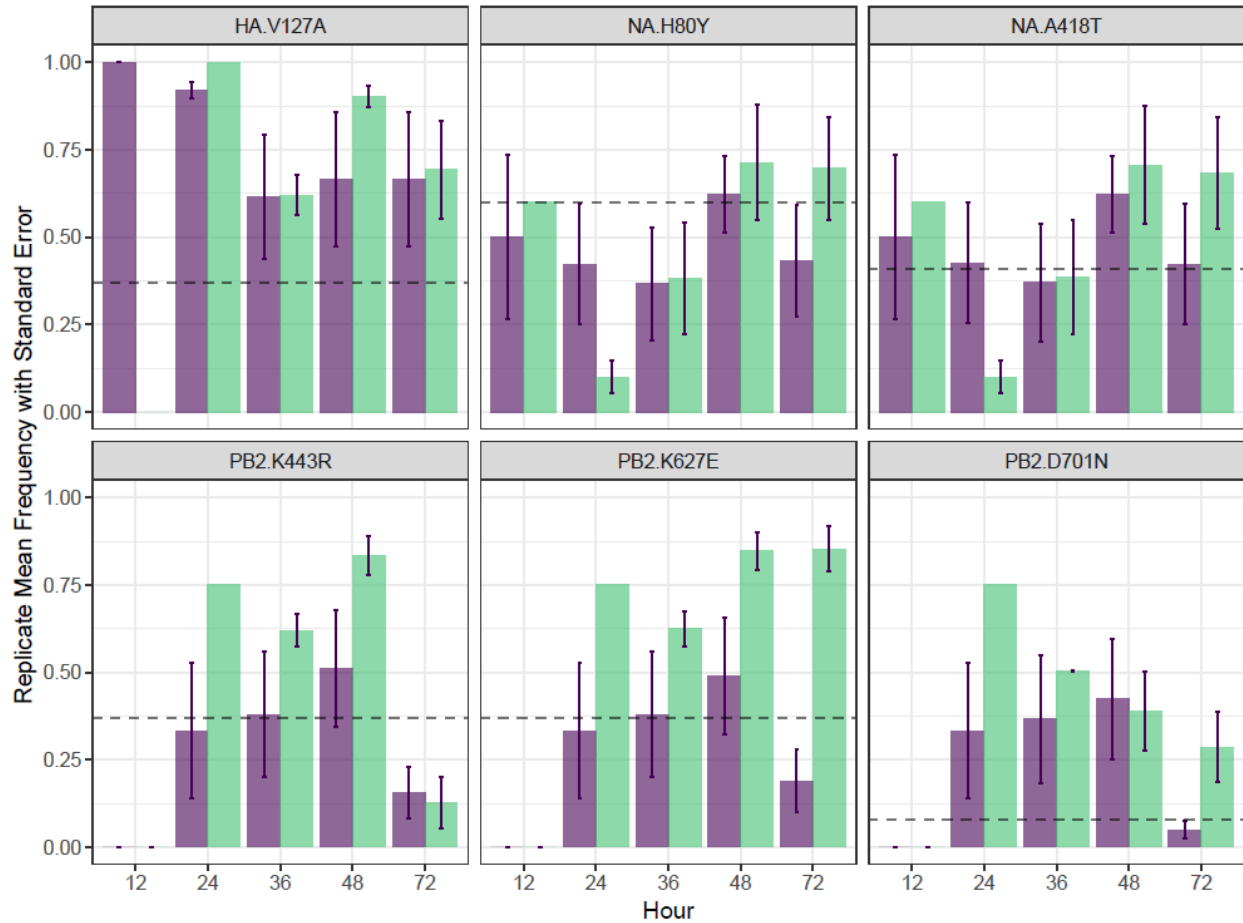

**Figure S9. Viral mutation frequency of Thai/16 (HPAI H5N1) influenza A virus over time in respiratory or corneal cultures.** Selected mutations of interest showing mean frequency across all replicates with standard error bars in EpiAiway (purple) and EpiCorneal (green) tissue constructs between 12-72 hours p.i. Dashed black line represents the stock inoculum mean frequency.
